# Supplementary material for: Milk quality control: instant and quantitative milk fat determination with a BODIPY sensor-based fluorescence detector
Source: Royal Society of Chemistry journal article supplement (doi:10.1039/c4cc04670f), 2014-01-01
Supplement: c4cc04670f1.pdf [file c4cc04670f1.pdf]

# Instant and Quantitative Fat Amount Determination in Milk Quality Control Using a BODIPY Fluorescent Sensor-based Detector

Wang Xu, <sup>a, b</sup> Jiaojiao Bai, <sup>a</sup> Juanjuan Peng, <sup>a</sup> Animesh Samanta, <sup>a</sup> Divyanshu <sup>c</sup> and Young-Tae Chang <sup>\*, a</sup>

<sup>a</sup> Department of Chemistry & MedChem Program of Life Sciences Institute, National University of Singapore, 117543  
Singapore Bioimaging Consortium, Agency for Science, Technology and Research (A\*STAR), 138667, Singapore  
Tel: (65) 6516-6774, Fax: (+65) 6779-1691

Email: [chmcyt@nus.edu.sg](mailto:chmcyt@nus.edu.sg)

<sup>b</sup> Singapore Peking Oxford Research Enterprise (SPORE), Environmental Research Institute (NERI), 5A Engineering Drive 1, #02-01, 117411, Singapore

<sup>c</sup> Department of Chemistry, Indian Institute of Technology-Kanpur

Corresponding author: Young-Tae Chang  
Tel: (65) 6516-6774, Fax: (+65) 6779-1691  
Email: [chmcyt@nus.edu.sg](mailto:chmcyt@nus.edu.sg)

## Contents

|                                                                          |    |
|--------------------------------------------------------------------------|----|
| Part 1: Materials and Methods.....                                       | 2  |
| Part 2: Experimental Sections .....                                      | 2  |
| Part 3: Diagram of Imaging Black Box and Hyper-Throughput Screening..... | 3  |
| Part 4: Milk Auto-fluorescence Background.....                           | 4  |
| Part 5: MO Characterization .....                                        | 5  |
| Part 6: MO Applicability Chart .....                                     | 5  |
| Part 7: MO Colour Change towards Milk Fat .....                          | 6  |
| Part 8: Detailed Ingredients of All Milk Brands .....                    | 7  |
| Part 9: Milk Fat Detector Parts .....                                    | 14 |
| Part 10: NMR Spectra .....                                               | 15 |

## **Materials and Methods**

All the chemicals were purchased from Sigma Aldrich, Fluka, MERCK, Acros and Alfa Aesar and they were directly used without further purification. The milk samples were purchased from local supermarket and their parameters were listed below. Normal phase column chromatography purification was carried using MERCK silica Gel 60 (Particle size: 230-400 mesh, 0.040-0.063 mm). HPLC-MS was taken on an Agilent-1200 with a DAD detector and a single quadrupole mass spectrometer (6130 series). The analytical method, unless otherwise indicated, is A: H<sub>2</sub>O (0.1% HCOOH), B: CH<sub>3</sub>CN (0.1% HCOOH), gradient from 10 to 90% B in 10 minutes; C18 (2) Luna column (4.6 \* 50 mm<sup>2</sup>, 3.5 μm particle size). <sup>1</sup>H-NMR, <sup>13</sup>C-NMR and <sup>19</sup>F-NMR spectra were recorded on Bruker Avance 300 NMR and 500 NMR spectrometers, and chemical shifts are expressed in parts per million (ppm) and coupling constants are reported as a J value in Hertz (Hz). Spectroscopy was performed using a fluorimeter and UV/Vis instrument, SpectraMax M2, Molecular Devices. All the data analysis was performed using GraphPrism 6.0 software.

## Experimental Sections

*Synthesis of Milk Orange (Scheme S1):* BODIPY precursor 1' (25 mg, 60  $\mu\text{mol}$ ) and thiophene-2-carbaldehyde 2' (27 mg/21  $\mu\text{L}$ , 240  $\mu\text{mol}$ , 4 equiv.) were dissolved in 2.5 mL acetonitrile, with 4 equiv. of pyrrolidine (29  $\mu\text{L}$ ) and 4 equiv. of acetic acid (20  $\mu\text{L}$ ). The mixture was shaken at 95  $^{\circ}\text{C}$  for 5 minutes, followed by immediate cooling down to 0  $^{\circ}\text{C}$ . The resulting crude mixture was concentrated under vacuum and purified by flash column chromatography on silica gel (dichloromethane-methanol: 9.8:0.2) to afford 3' as a dark purple solid (12.5 mg, 24  $\mu\text{mol}$ , 40% yield, 99.9% purity, Figure S3).  $^1\text{H}$  NMR (500 MHz,  $\text{CDCl}_3$ )  $\delta$  7.47 (s, 1H), 7.46 (s, 1H), 7.43 (s, 1H), 7.38 – 7.32 (m, 2H), 7.06 (s, 1H), 6.88 (d,  $J = 3.9$  Hz, 1H), 6.69 (s, 1H), 6.31 (d,  $J = 3.9$  Hz, 1H), 4.78 (s, 2H), 3.39 (t,  $J = 7.5$  Hz, 2H), 2.96 (t,  $J = 7.5$  Hz, 2H), 2.30 (s, 3H).  $^{13}\text{C}$  NMR (126 MHz,  $\text{CDCl}_3$ )  $\delta$  171.03, 157.27, 155.73, 143.03, 139.38, 136.80, 133.75, 132.51, 127.24, 126.75, 126.38, 125.52, 122.12, 118.72, 116.66, 116.56, 94.92, 74.10, 31.92, 22.68, 11.38. HRMS ( $\text{C}_{21}\text{H}_{18}\text{BCl}_3\text{F}_2\text{N}_2\text{O}_2\text{S}$ ): calc.  $[\text{M} + \text{Na}]^+$ : 539.0120, found  $[\text{M} + \text{Na}]^+$ : 539.0112; calc.  $[\text{M} - \text{F}]^+$ : 497.0236, found  $[\text{M} - \text{F}]^+$ : 497.0230.

*Milk fat measurement procedures:* In high-throughput screening approach, black Greiner 96-well plates were pre-filled with the fluorescence dyes from DOFL at 1 nmol quantity and were dissolved in 1  $\mu\text{L}$  DMSO to make 1 mM solution. In each well, 98  $\mu\text{L}$  DI water was added, mixed well and the plate image was taken one time as dye background. After taking image, 1  $\mu\text{L}$  of milk sample was added into the well, mixed well and the plate image was taken again. Both images were imported into Adobe Photoshop program and compared side-by-side to grant discovery of potential hit compounds. In other non-plate tests such as cuvettes, 1 mM sensor solution was first prepared and diluted with DI water, followed by addition of milk (1% (v/v)). The samples were then inserted into SpectroMax M2 plate reader or measured by constructed fat detector. 365 nm UV excitation was applied in all image-based high-throughput screening whereas 530 nm excitation was used when measuring the spectra of Milk Orange.

*Quantum yields measurement:* Quantum yield for MO was measured by dividing the integrated emission area of their fluorescent spectrum against the area of Rhodamine B in DMSO excited at 500 nm ( $\Phi_{\text{rho-B}} = 0.49$ ). Quantum yield was then calculated using equation (1), where  $F$  represents the integrated emission area of fluorescent spectrum,  $\eta$  represents the refractive index of the solvent, and  $Abs$  represents absorbance at excitation wavelength selected for standards and samples. Emission was integrated from 560 nm to 680 nm.

$$\Phi_{flu}^{sample} = \Phi_{flu}^{reference} \left( \frac{F^{sample}}{F^{reference}} \right) \left( \frac{\eta^{sample}}{\eta^{reference}} \right) \left( \frac{Abs^{reference}}{Abs^{sample}} \right)$$

*$^{19}\text{F}$  NMR test:* 18 mg MO compound was dissolved in 30  $\mu\text{L}$  DMSO- $d_6$  solvent and then divided into 5 equal aliquots, each aliquot diluted with  $\text{D}_2\text{O}$  to 500  $\mu\text{L}$ . Its concentration was determined to be 14 mM. Milk fat component was extracted from fresh milk sample by dichloromethane and dried under vacuum. It was weighted and 2.5 mg, 5 mg, 10 mg and 20 mg fat was added into each

MO sample, respectively, thus making MO solutions containing 0.0%, 0.5%, 1.0%, 2.0% and 4.0% fat by mass. <sup>19</sup>F NMR was taken on a Bruker DRX 300 NMR spectrometer to afford spectra of each sample, followed by analysis on MestReNova software.

*Dynamic light scattering measurement:* The dynamic radius of MO-milk samples was measured at 25°C in deionized water using quartz cell. 1 mM DMSO solution of MO was slowly added to water (1% (v/v)) and gives 10 μM concentration. Milk samples were also added to the solution (1% (v/v)) and mixed well. All measurements were performed in triplicate in Zetasizer Nano ZS.

*Construction of milk fat detector:* each single piece of detector components were purchased separately. The Ultra High Power LED Light was bought from Prizmatix and emits bright white light covering 400-700 nm spectrum. The green light filter (520 +/- 5 nm) was purchased from ASAHI. Both optical fiber and the grating fluorescence detector were purchased from Ocean Optics. During measurement, just dipping the probe inside the sample, its spectra from 400-1100 nm could be instantly shown on the computer for analysis.

### Diagram of Imaging Black Box and Hyper-Throughput Screening

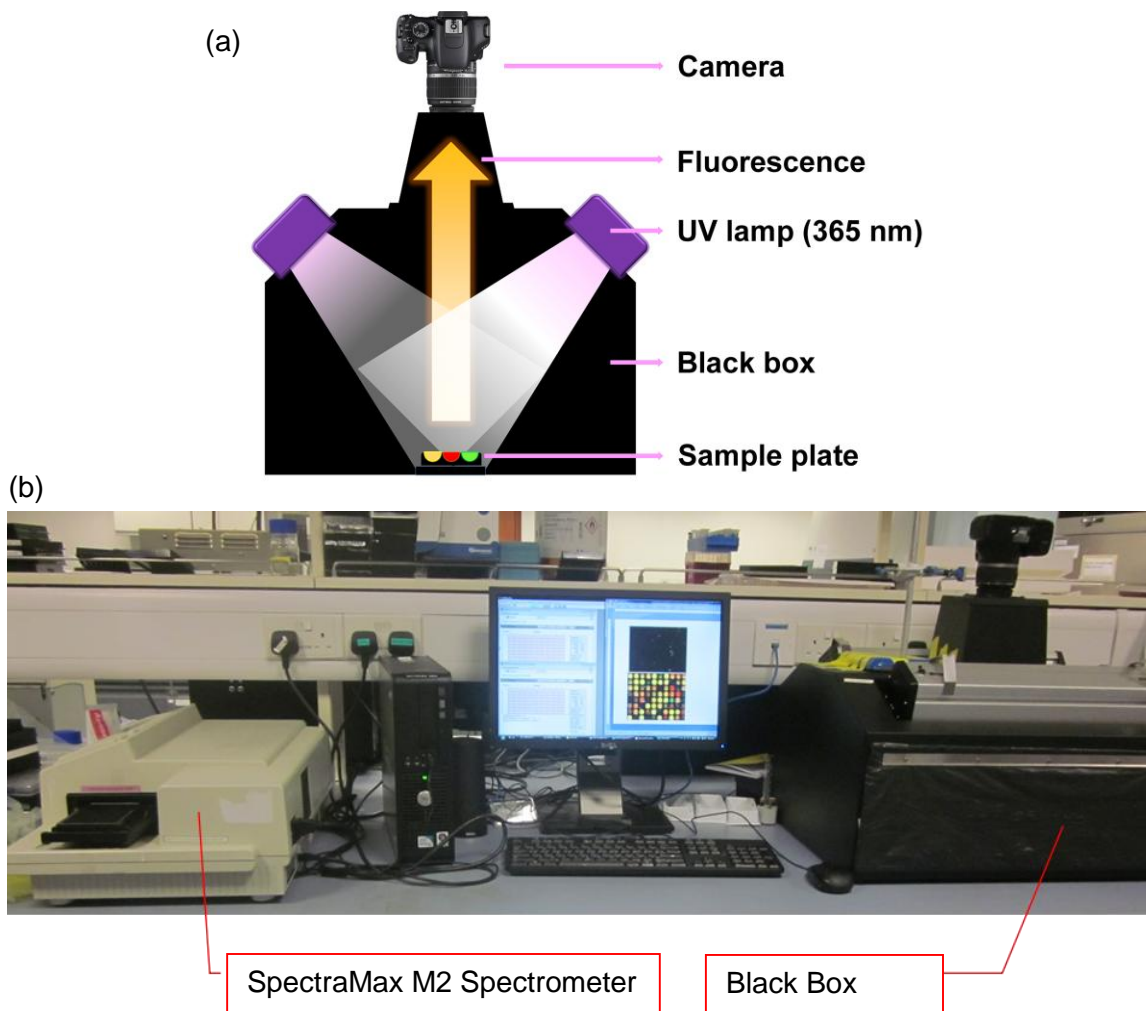

Figure S1. Diagram of imaging black box. (a) Diagram of each components in the black box. The black box is Spectroline Model CL-150 UV-fluorescence analysis cabinet. It is equipped with two UV lamps - 15W long wave tube of 365 nm (model: xx-15NF) – peak intensity of 550  $\mu\text{W}/\text{cm}^2$ . The images are taken with Canon EOS 400D (Digital Rebel XTi). (b) The whole high-throughput screening and validation set. It is composed of image black box and the spectrometer machine.

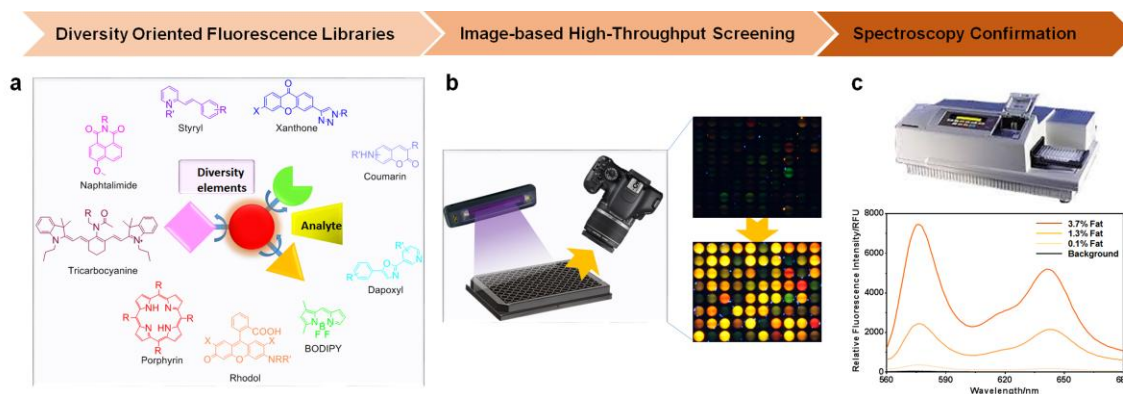

Figure S2. Scheme of hyper-throughput screening approach. (a) Construction of DOFL dyes based on fluorescence scaffolds of various emission colors and diversity elements. (b) Scheme of image-based screening. The plate is pre-filled with dyes, irradiated with a 365 nm UV lamp and taken image both before and after addition of milk samples. (c) Selected hit compounds are subjected to validation using a professional spectrometer. The milk fat sensor that shows best linearity and highest intensity change has been selected.

## Milk Auto-fluorescence Background

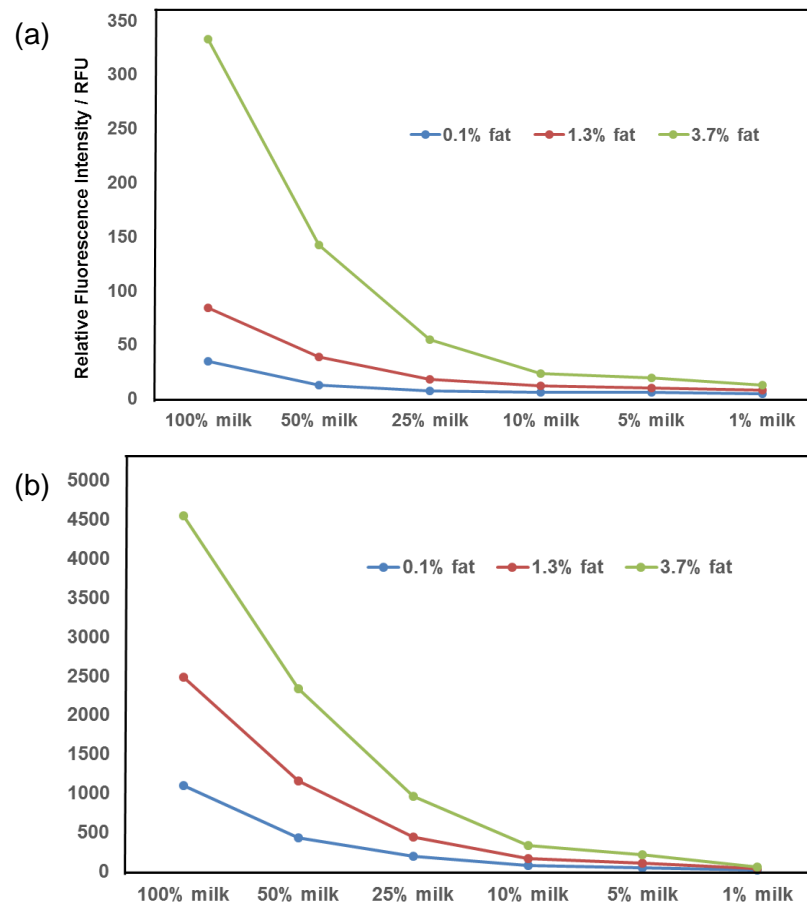

Figure S3. Milk auto-fluorescence background excited at (a) 530 nm; (b) 365 nm.

## MO Characterization

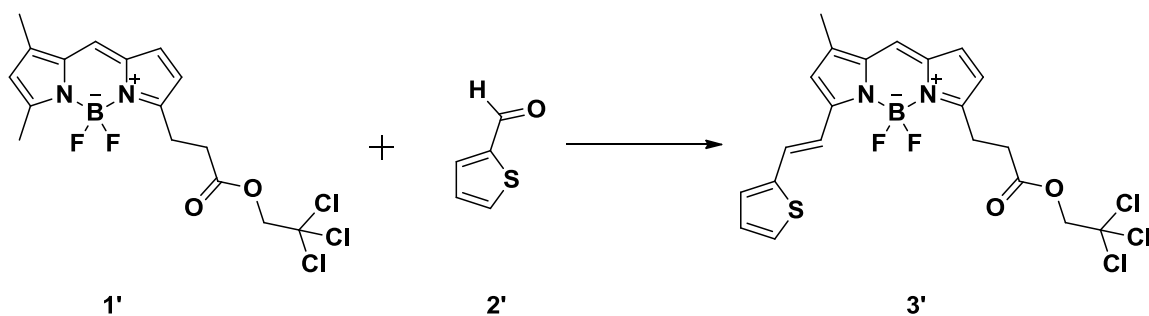

Scheme S1. Synthetic route to form **3'** (MO).

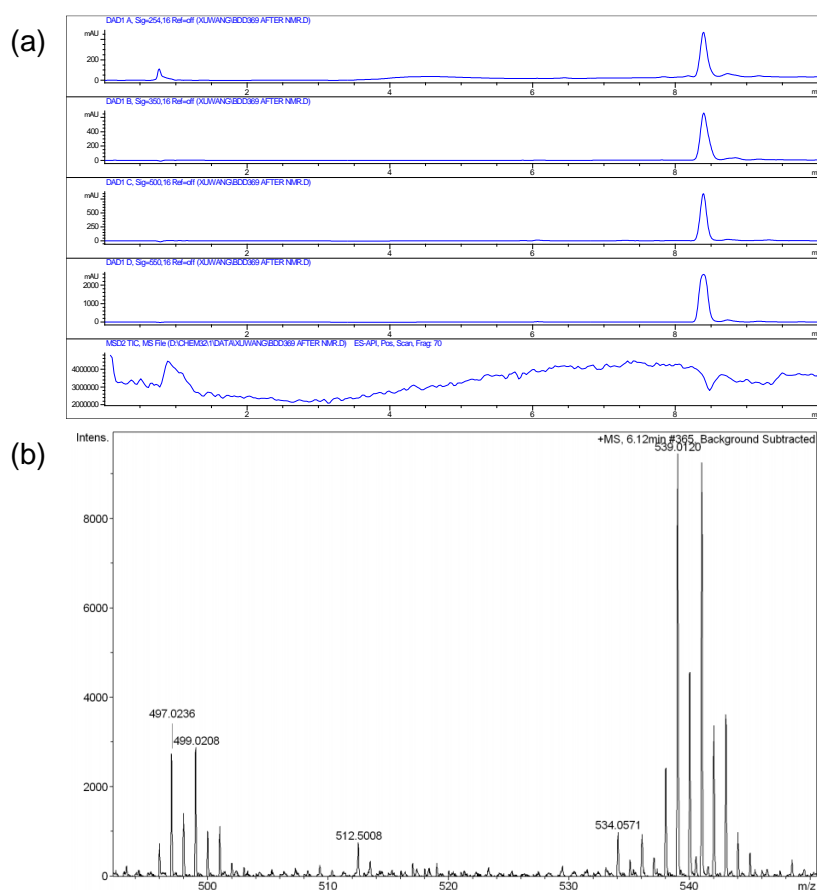

Figure S4. HPLC and HRMS characterization of MO. (a) chromatogram of MO. It indicates that MO purity is more than 99%. HPLC conditions: A: H<sub>2</sub>O-HCOOH: 99.9:0.1. B: CH<sub>3</sub>CN-HCOOH: 99.9:0.1; gradient 5% B to 95% B (10 min), isocratic 95% B (2.5 min). Reverse phase Phenomenex C18 Luna column (4.6 x 50 mm<sup>2</sup>) 3.5μm, flow rate: 1.0 mL/min. (b) HRMS of MO.



## **MO Applicability Chart**

Table S1. Comparison of fat concentrations acquired from fluorescence measurement and ingredient tables listed on milk package.

| <b>Brands of milk</b> |         | <b>Official report<br/>(g/100ml)</b> |                     |            | <b>Fluorescence test<br/>(g/100ml)</b> |
|-----------------------|---------|--------------------------------------|---------------------|------------|----------------------------------------|
|                       |         | <b>Protein</b>                       | <b>Carbohydrate</b> | <b>Fat</b> | <b>Fat</b>                             |
| <b>Greenfields®</b>   | Skim    | 3.9                                  | 4.2                 | 0.1        | 0.10±0.01                              |
|                       | Low fat | 4.0                                  | 3.9                 | 1.3        | 1.31±0.01                              |
|                       | Fresh   | 4.0                                  | 3.9                 | 3.7        | 3.69±0.02                              |
| <b>Pura®</b>          | Skim    | 4.0                                  | 5.4                 | 0.1        | 0.11 ±0.01                             |
|                       | Low fat | 3.6                                  | 5.0                 | 1.4        | 1.42±0.01                              |
|                       | Fresh   | 3.2                                  | 4.9                 | 3.4        | 3.42±0.02                              |
| <b>Meiji®</b>         | Skim    | 3.2                                  | 6.9                 | 0.1        | 0.10±0.01                              |
|                       | Low fat | 3.2                                  | 7.0                 | 1.2        | 1.18±0.01                              |
|                       | Fresh   | 3.3                                  | 5.0                 | 4.1        | 4.09±0.02                              |
| <b>Farmhouse®</b>     | Low fat | 4.0                                  | 5.5                 | 1.5        | 1.52±0.01                              |
|                       | Fresh   | 3.2                                  | 4.8                 | 3.8        | 3.80±0.02                              |
| <b>Marigold®</b>      | Low fat | 5.0                                  | 5.3                 | 1.0        | 1.00±0.01                              |
|                       | Fresh   | 3.5                                  | 5.0                 | 3.6        | 3.59±0.01                              |
| <b>Magnolia®</b>      | Low fat | 3.7                                  | 5.0                 | 1.5        | 1.52±0.00                              |
|                       | Fresh   | 4.0                                  | 5.0                 | 4.0        | 3.98±0.01                              |
| <b>Daisy®</b>         | Low fat | 3.5                                  | 5.2                 | 1.0        | 1.00±0.01                              |

## MO Colour Change towards Milk Fat

(a) 0% 0.1% 0.34% 0.58% 0.82% 1.06% 1.30% 1.78% 2.26% 2.74% 3.22% 3.70%

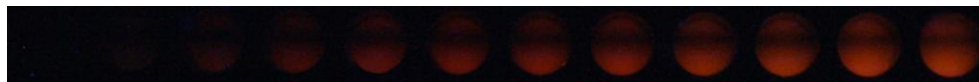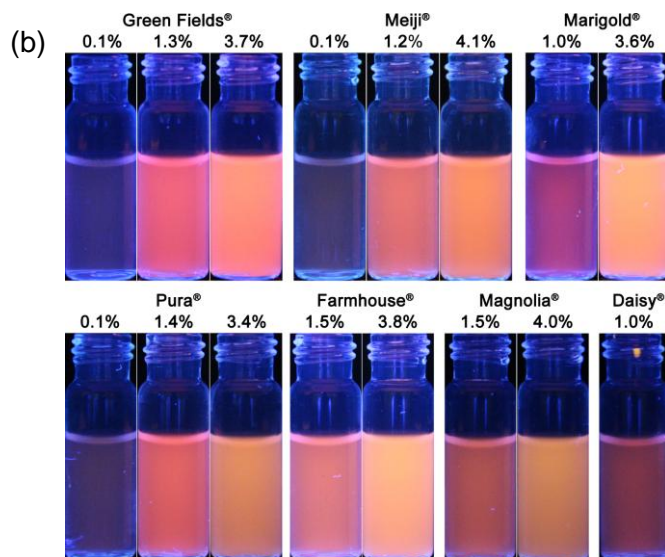

Figure S5. (a) Dose-dependent image of MO-milk fat composites. Upper row is the milk fat concentration by mass. The image is taken in a Greiner U-shape 96 well black plate and the exposure time is 30s. MO concentration is 10  $\mu$ M. (b) Image of MO towards various brands of milk under irradiation of UV lamp. Volume is 3 mL for each bottle and MO concentration is 10  $\mu$ M. Exposure time is 0.2s in all cases.

## Detailed Ingredients of All Milk Brands

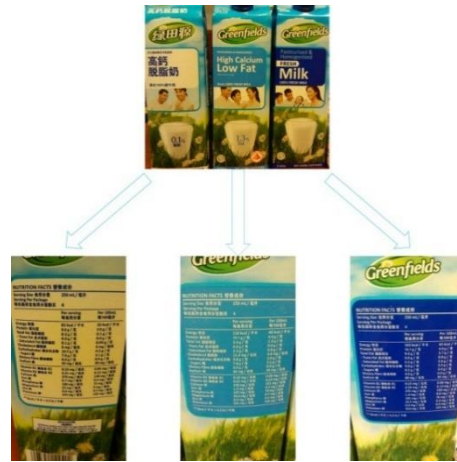

Table S2. Greenfields ingredients.

| <i>Greenfields</i> | <b>Fresh milk</b> |           | <b>High Calcium Low fat</b> |           | <b>High Calcium Skimmed milk</b> |           |
|--------------------|-------------------|-----------|-----------------------------|-----------|----------------------------------|-----------|
|                    | Per serving       | Per 100mL | Per serving                 | Per 100mL | Per serving                      | Per 100mL |
| Energy             | 163 kcal          | 65 kcal   | 110 kcal                    | 44 kcal   | 82 kcal                          | 33 kcal   |
| Protein            | 10.1 g            | 4.0 g     | 10.1 g                      | 4.0 g     | 9.8 g                            | 3.9 g     |
| Total fat          | 9.3 g             | 3.7 g     | 3.4 g                       | 1.3 g     | 0.3 g                            | 0.1g      |
| -Trans Fat         | 0.0 g             | 0.0 g     | 0.0 g                       | 0.0 g     | 0.0 g                            | 0.0 g     |
| -Saturated Fat     | 6.5 g             | 2.6 g     | 2.3 g                       | 0.9 g     | 0.1 g                            | 0.04 g    |
| Cholesterol        | ~                 | ~         | 11.4 mg                     | 4.6 mg    | 0mg                              | 0 mg      |
| Carbohydrate       | 9.8 g             | 3.9 g     | 9.8 g                       | 3.9 g     | 10.5 g                           | 4.2 g     |
| Sugars             | 8.5 g             | 3.4 g     | 7.8 g                       | 3.1 g     | 7.8 g                            | 3.1 g     |
| Dietary Fibre      | 0.0 g             | 0.0 g     | 0.0 g                       | 0.0 g     | 0.0 g                            | 0.0 g     |
| Sodium             | 89 mg             | 36 mg     | 86 mg                       | 34 mg     | 95 mg                            | 38 mg     |
| Vitamin B1         | 0.15 mg           | 0.06 mg   | 0.16 mg                     | 0.06 mg   | 0.16 mg                          | 0.06 mg   |
| Vitamin B2         | 0.34 mg           | 0.13 mg   | 0.31 mg                     | 0.12 mg   | 0.31 mg                          | 0.12 mg   |
| Calcium            | 375 mg            | 150 mg    | 378 mg                      | 151 mg    | 370 mg                           | 148 mg    |
| Iron               | 1.4 mg            | 0.6 mg    | 1.2 mg                      | 0.5 mg    | 0.7 mg                           | 0.3 mg    |
| Phosphorus         | 191 mg            | 76 mg     | 197 mg                      | 79 mg     | 188 mg                           | 75 mg     |
| Magnesium          | 23.5 mg           | 9.4 mg    | 24.3 mg                     | 9.7 mg    | 23 mg                            | 9 mg      |
| Zinc               | 0.9 mg            | 0.4 mg    | 0.9 mg                      | 0.4 mg    | 0.8 mg                           | 0.3 mg    |
| Potassium          | 313 mg            | 125 mg    | 331 mg                      | 133 mg    | 334 mg                           | 134 mg    |

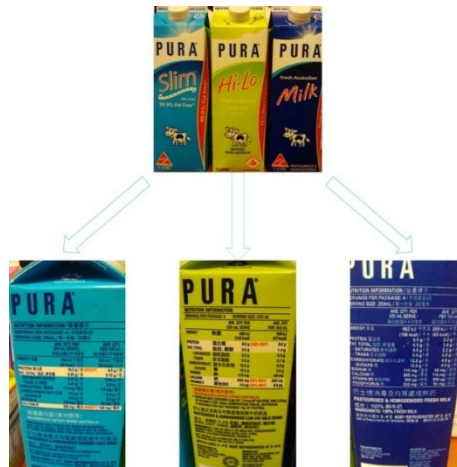

Table S3. PURA ingredients.

| <i>PURA</i>    | Fresh milk        |           | High Calcium Low fat |           | High Calcium Skimmed milk |           |
|----------------|-------------------|-----------|----------------------|-----------|---------------------------|-----------|
|                | Per 250ml serving | Per 100mL | Per serving          | Per 100mL | Per serving               | Per 100mL |
| Energy         | 156 kcal          | 63 kcal   | 118 kcal             | 47 kcal   | 97 kcal                   | 39 kcal   |
| Protein        | 8.0 g             | 3.2 g     | 9.0 g                | 3.6 g     | 10.0 g                    | 4.0 g     |
| Total fat      | 8.5 g             | 3.4 g     | 3.5 g                | 1.4 g     | 0.25 g                    | 0.10 g    |
| -Trans Fat     | 0.5 g             | 0.2 g     | 0.3 g                | 0.1 g     | 0.03 g                    | 0.01 g    |
| -Saturated Fat | 5.5 g             | 2.2 g     | 2.3 g                | 0.9 g     | 0.15 g                    | 0.06 g    |
| Cholesterol    | ~                 | ~         | ~                    | ~         | 7.5 mgL                   | 3.0 mg    |
| Carbohydrate   | 12.2 g            | 4.9 g     | 12.5 g               | 5.0 g     | 13.5 g                    | 5.4 g     |
| Sugars         | 12.2 g            | 4.9 g     | 12.5 g               | 5.0 g     | 13.5 g                    | 5.4 g     |
| Sodium         | 110 mg            | 44 mg     | 115 mg               | 46 mg     | 125 mg                    | 50 mg     |
| Vitamin D      | ~                 | ~         | 2.0 ug               | 0.8 ug    | ~                         | ~         |
| Vitamin B2     | 500 ug            | 200 ug    | 0.31 mg              | 0.12 mg   | ~                         | ~         |
| Calcium        | 295 mg            | 118 mg    | 500 mg               | 200 mg    | 350 mg                    | 140 mg    |
| Phosphorus     | 232 mg            | 93mg      | 197 mg               | 79 mg     | ~                         | ~         |

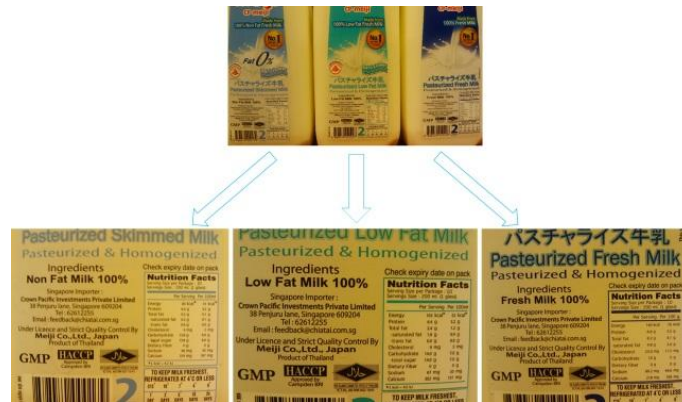

Table S4. Meiji ingredients.

| <i>Meiji</i>   | Fresh milk  |           | High Calcium Low fat |           | High Calcium Skimmed milk |           |
|----------------|-------------|-----------|----------------------|-----------|---------------------------|-----------|
|                | Per serving | Per 100mL | Per serving          | Per 100mL | Per serving               | Per 100mL |
| Energy         | 140 kcal    | 70 kcal   | 103 kcal             | 52 kcal   | 83 kcal                   | 41 kcal   |
| Protein        | 6.6 g       | 3.3 g     | 6.4 g                | 3.2 g     | 6.4 g                     | 3.2 g     |
| Total fat      | 8.2 g       | 4.1 g     | 2.4 g                | 1.2 g     | 0.2 g                     | 0.1 g     |
| -Trans Fat     | ~           | ~         | 0.0 g                | 0.0 g     | 0.0 g                     | 0.0 g     |
| -Saturated Fat | 4.8 g       | 2.4 g     | 1.8 g                | 0.9 g     | 0.2 g                     | 0.1 g     |
| Cholesterol    | 23.0 mg     | 11.5 mg   | 9 mg                 | 5 mg      | 4 mg                      | 2 mg      |
| Carbohydrate   | 10.0 g      | 5.0 g     | 14.0 g               | 7.0 g     | 13.8 g                    | 6.9 g     |
| -Sugars        | ~           | ~         | 14.0 g               | 7.0 g     | 13.8 g                    | 6.9 g     |
| Dietary Fibre  | 0.0 g       | 0.0 g     | 0.0 g                | 0.0 g     | 0.0 g                     | 0.0 g     |
| Sodium         | 89.2 mg     | 44.6 mg   | 67 mg                | 33 mg     | 66 mg                     | 33 mg     |
| Calcium        | 218 mg      | 109 mg    | 302 mg               | 151 mg    | 374 mg                    | 187 mg    |

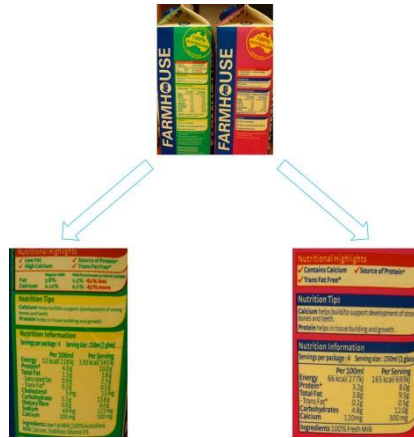

Table S5. Farmhouse ingredients.

| <i><b>Farmhouse</b></i> | <b>Fresh milk</b> |           | <b>High Calcium Low fat</b> |           |
|-------------------------|-------------------|-----------|-----------------------------|-----------|
|                         | Per serving       | Per 100mL | Per serving                 | Per 100mL |
| Energy                  | 165 kcal          | 66 kcal   | 130 kcal                    | 52 kcal   |
| Protein                 | 8.0 g             | 3.2 g     | 10.0 g                      | 4.0 g     |
| Total fat               | 9.5 g             | 3.8 g     | 3.8 g                       | 1.5 g     |
| -Trans Fat              | 0.5 g             | 0.2 g     | 0.5 g                       | 0.2 g     |
| -Saturated Fat          | ~                 | ~         | 2.3 g                       | 0.9 g     |
| Cholesterol             | ~                 | ~         | 13 mg                       | 5 mg      |
| Carbohydrate            | 12.0 g            | 4.8 g     | 13.8 g                      | 5.5 g     |
| Dietary Fibre           | ~                 | ~         | 0.0 g                       | 0.0 g     |
| Sodium                  | 89.2 mg           | 44.6 mg   | 123 mg                      | 49 mg     |
| Calcium                 | 300 mg            | 120 mg    | 500 mg                      | 200 mg    |

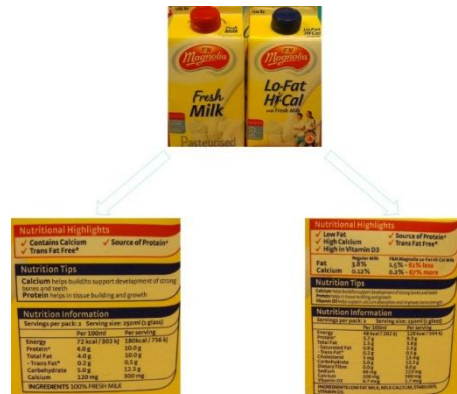

Table S6. Magnolia ingredients.

| <i><b>F&amp;N<br/>Magnolia</b></i> | <b>Fresh milk</b> |           | <b>High Calcium Low fat</b> |           |
|------------------------------------|-------------------|-----------|-----------------------------|-----------|
|                                    | Per serving       | Per 100mL | Per serving                 | Per 100mL |
| Energy                             | 180 kcal          | 72 kcal   | 120 kcal                    | 48 kcal   |
| Protein                            | 10.0 g            | 4.0 g     | 9.3 g                       | 3.7 g     |
| Total fat                          | 10.0 g            | 4.0 g     | 3.8 g                       | 1.5 g     |
| -Trans Fat                         | 0.5 g             | 0.2 g     | 0.5 g                       | 0.2 g     |
| -Saturated Fat                     | ~                 | ~         | 2.3 g                       | 0.9 g     |
| Cholesterol                        | ~                 | ~         | 13 mg                       | 5 mg      |
| Carbohydrate                       | 12.5 g            | 5.0 g     | 12.5 g                      | 5.0 g     |
| Dietary Fibre                      | ~                 | ~         | 0.0 g                       | 0.0 g     |
| Sodium                             | 89.2 mg           | 44.6 mg   | 123 mg                      | 49 mg     |
| Calcium                            | 300 mg            | 120 mg    | 500 mg                      | 200 mg    |
| Vitamin D3                         | ~                 | ~         | 1.7 mcg                     | 0.7 mcg   |

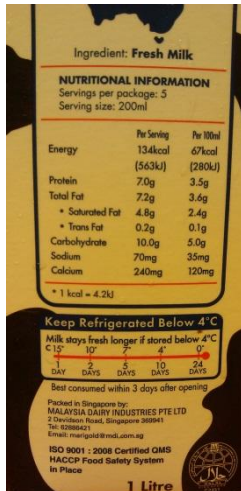

Table S7. Marigold fresh ingredients.

| <b>MARIGOLD</b> | <b>Fresh milk 100% fresh</b> |           |
|-----------------|------------------------------|-----------|
|                 | Per serving                  | Per 100mL |
| Energy          | 134 kcal                     | 67 kcal   |
| Protein         | 7.0 g                        | 3.5 g     |
| Total fat       | 7.2 g                        | 3.6 g     |
| -Trans Fat      | 0.2 g                        | 0.1 g     |
| -Saturated Fat  | 4.8 g                        | 2.4 g     |
| Carbohydrate    | 10.0 g                       | 5.0 g     |
| Sodium          | 70 mg                        | 35 mg     |
| Calcium         | 240 mg                       | 120 mg    |

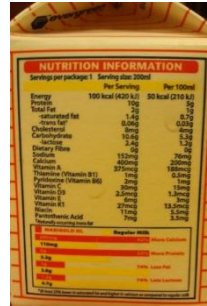

Table S8. Marigold fresh ingredients.

| <b>MARIGOLD HL</b>  | <b>High Calcium Low fat<br/>Low in Lactose with 9<br/>Vitamins</b> |           |
|---------------------|--------------------------------------------------------------------|-----------|
|                     | Per serving                                                        | Per 100mL |
| Energy              | 100 kcal                                                           | 50 kcal   |
| Protein             | 10 g                                                               | 5 g       |
| Total fat           | 2.0 g                                                              | 1.0 g     |
| -Trans Fat          | 0.06 g                                                             | 0.03 g    |
| -Saturated Fat      | 1.4 g                                                              | 0.7 g     |
| Cholesterol         | 8 mg                                                               | 4mg       |
| Carbohydrate        | 10.6 g                                                             | 5.3 g     |
| -Lactose            | 2.4 g                                                              | 1.2 g     |
| Dietary Fibre       | 0.0 g                                                              | 0.0 g     |
| Sodium              | 152 mg                                                             | 76 mg     |
| Calcium             | 400 mg                                                             | 200 mg    |
| Vitamin A           | 375 mcg                                                            | 188 mcg   |
| Thiamine (Vit B1)   | 1 mg                                                               | 0.5 mg    |
| Pyridoxine (Vit B6) | 2 mg                                                               | 1 mg      |
| Vitamin C           | 30 mg                                                              | 15 mg     |
| Vitamin D3          | 2.5 mcg                                                            | 1.3 mcg   |
| Vitamin E           | 6 mg                                                               | 3 mg      |
| Vitamin K1          | 27 mcg                                                             | 13.5 mcg  |
| Niacin              | 11 mg                                                              | 5.5 mg    |
| Pantothenic Acid    | 7 mg                                                               | 3.5 mg    |



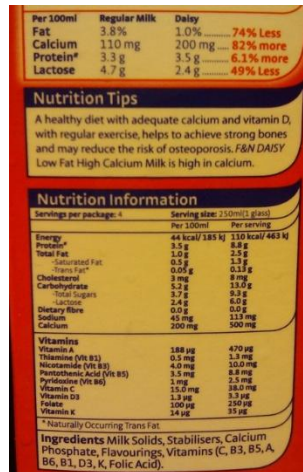

Table S9. Daisy ingredients.

| <b><i>F&amp;N Daisy</i></b> | <b>99% Fat Free</b> |           |
|-----------------------------|---------------------|-----------|
|                             | Per serving         | Per 100mL |
| Energy                      | 110 kcal            | 44 kcal   |
| Protein                     | 8.8 g               | 3.5 g     |
| Total fat                   | 2.5 g               | 1.0 g     |
| -Trans Fat                  | 0.13 g              | 0.05 g    |
| -Saturated Fat              | 1.3 g               | 0.5 g     |
| Cholesterol                 | 8 mg                | 3 mg      |
| Carbohydrate                | 13.0 g              | 5.2 g     |
| -Sugars                     | 9.3 g               | 3.7 g     |
| -Lactose                    | 6.0 g               | 2.4 g     |
| Dietary Fibre               | 0.0 g               | 0.0 g     |
| Sodium                      | 113 mg              | 45 mg     |
| Calcium                     | 500 mg              | 200 mg    |
| Vitamin A                   | 470 ug              | 188 ug    |
| Thiamine (Vit B1)           | 1.3 mg              | 0.5 mg    |
| Nicotamide (Vit B3)         | 10.0 mg             | 4.0 mg    |
| Pantothenic Acid (Vit B5)   | 8.8 mg              | 3.5 mg    |
| Pyridoxine (Vit B6)         | 2.5 mg              | 1 mg      |
| Vitamin C                   | 38.0 mg             | 15.0 mg   |
| Vitamin D3                  | 3.3 ug              | 1.3 ug    |
| Folate                      | 250 ug              | 100 ug    |
| Vitamin K                   | 35 ug               | 14 ug     |

## Milk Fat Detector Parts

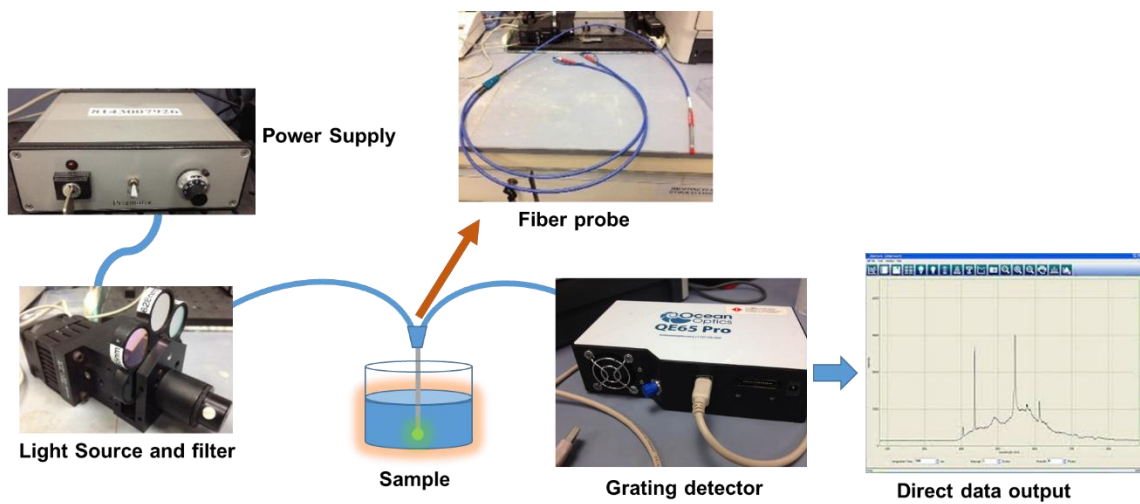

Figure S6. Scheme of each component of the milk fat detector.

## NMR spectra

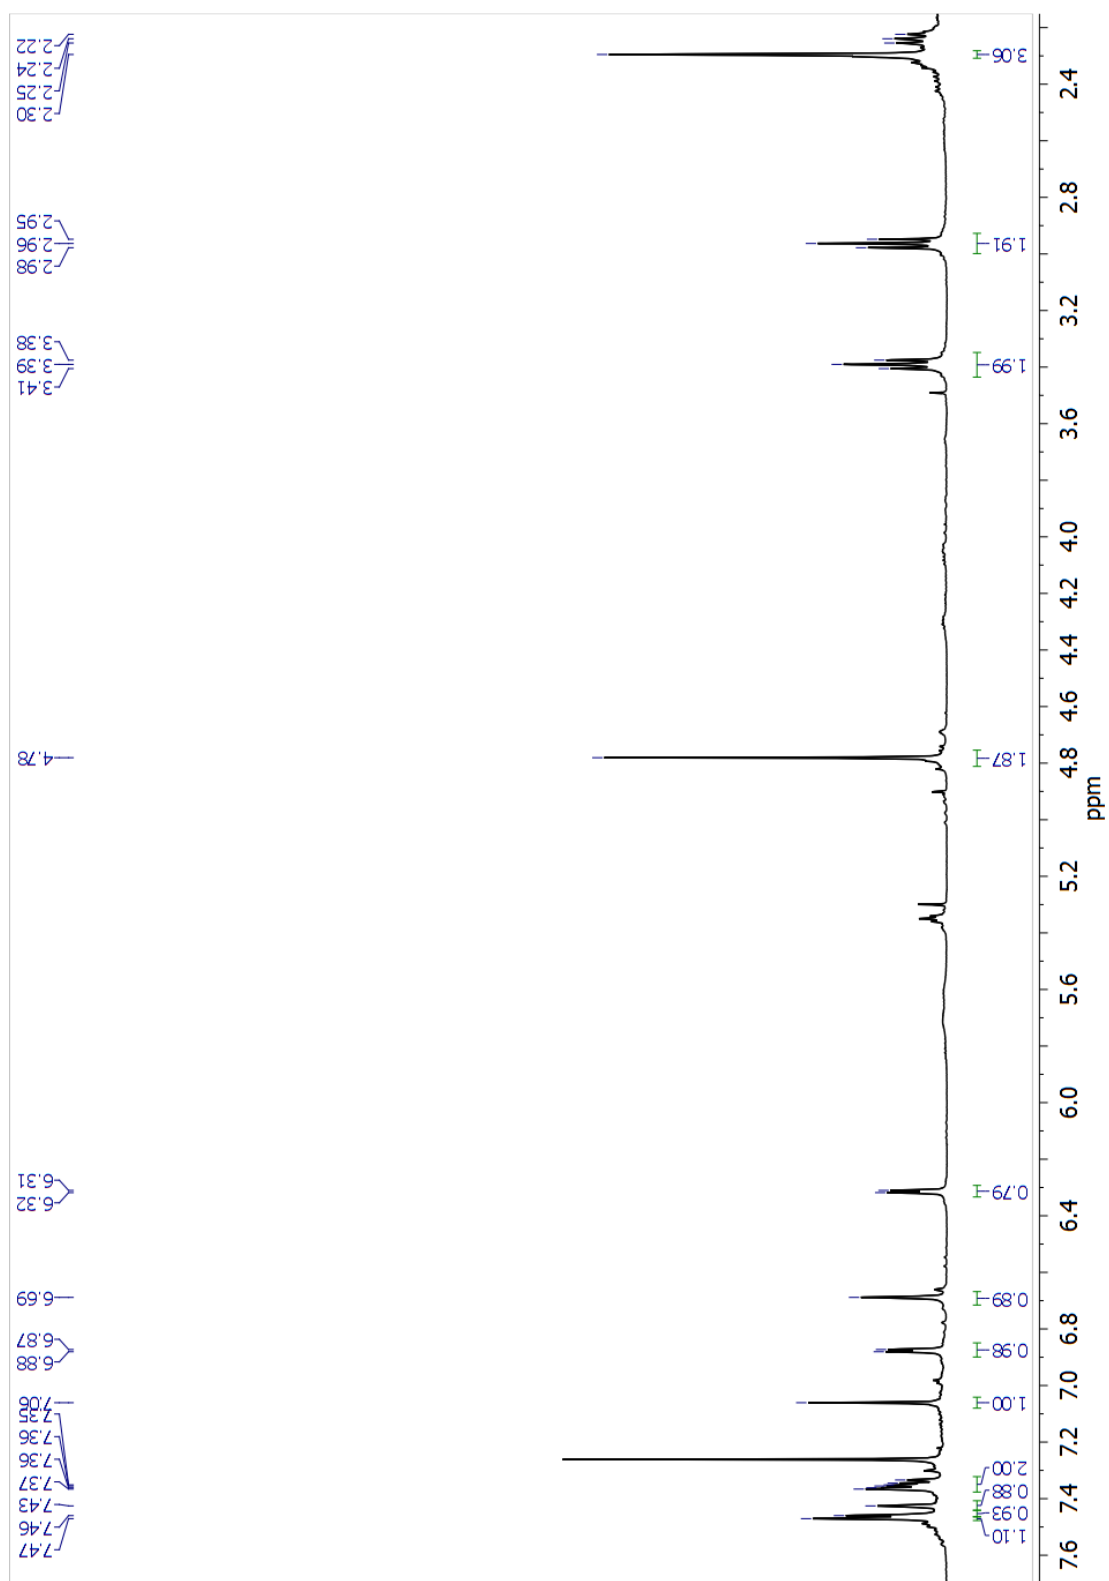

<sup>1</sup>H NMR spectra of MO in CDCl<sub>3</sub>.

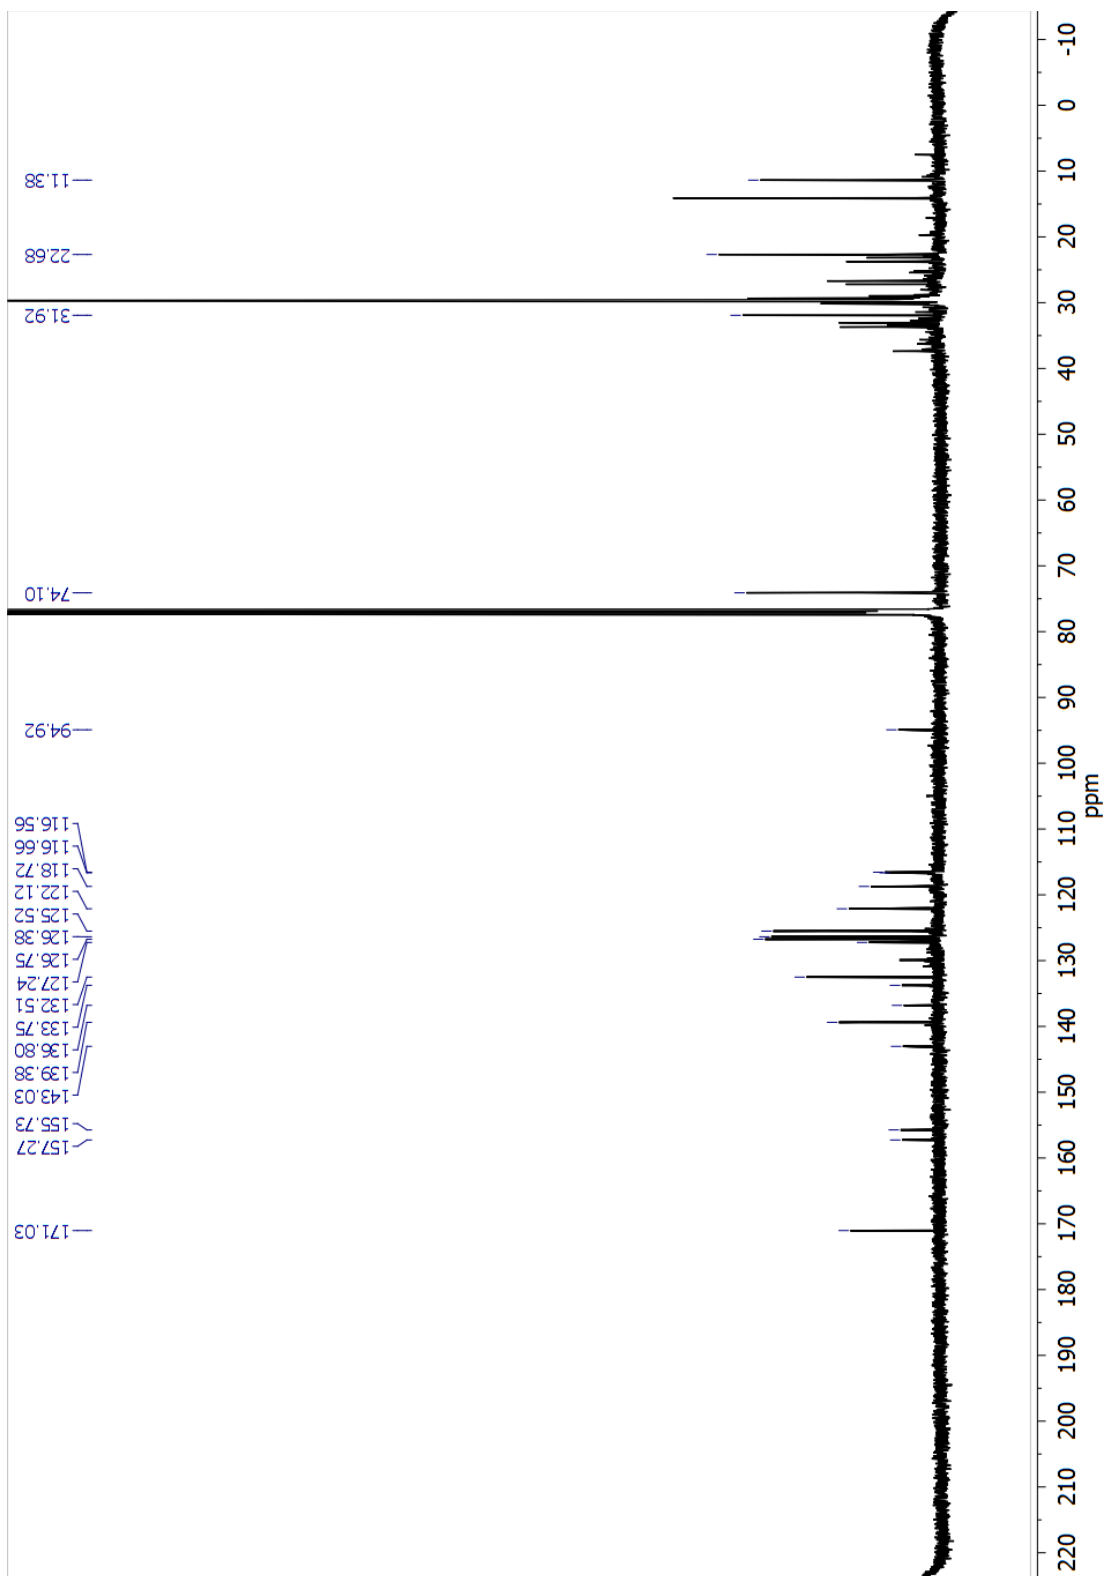

$^{13}\text{C}$  NMR spectra of MO in  $\text{CDCl}_3$ .

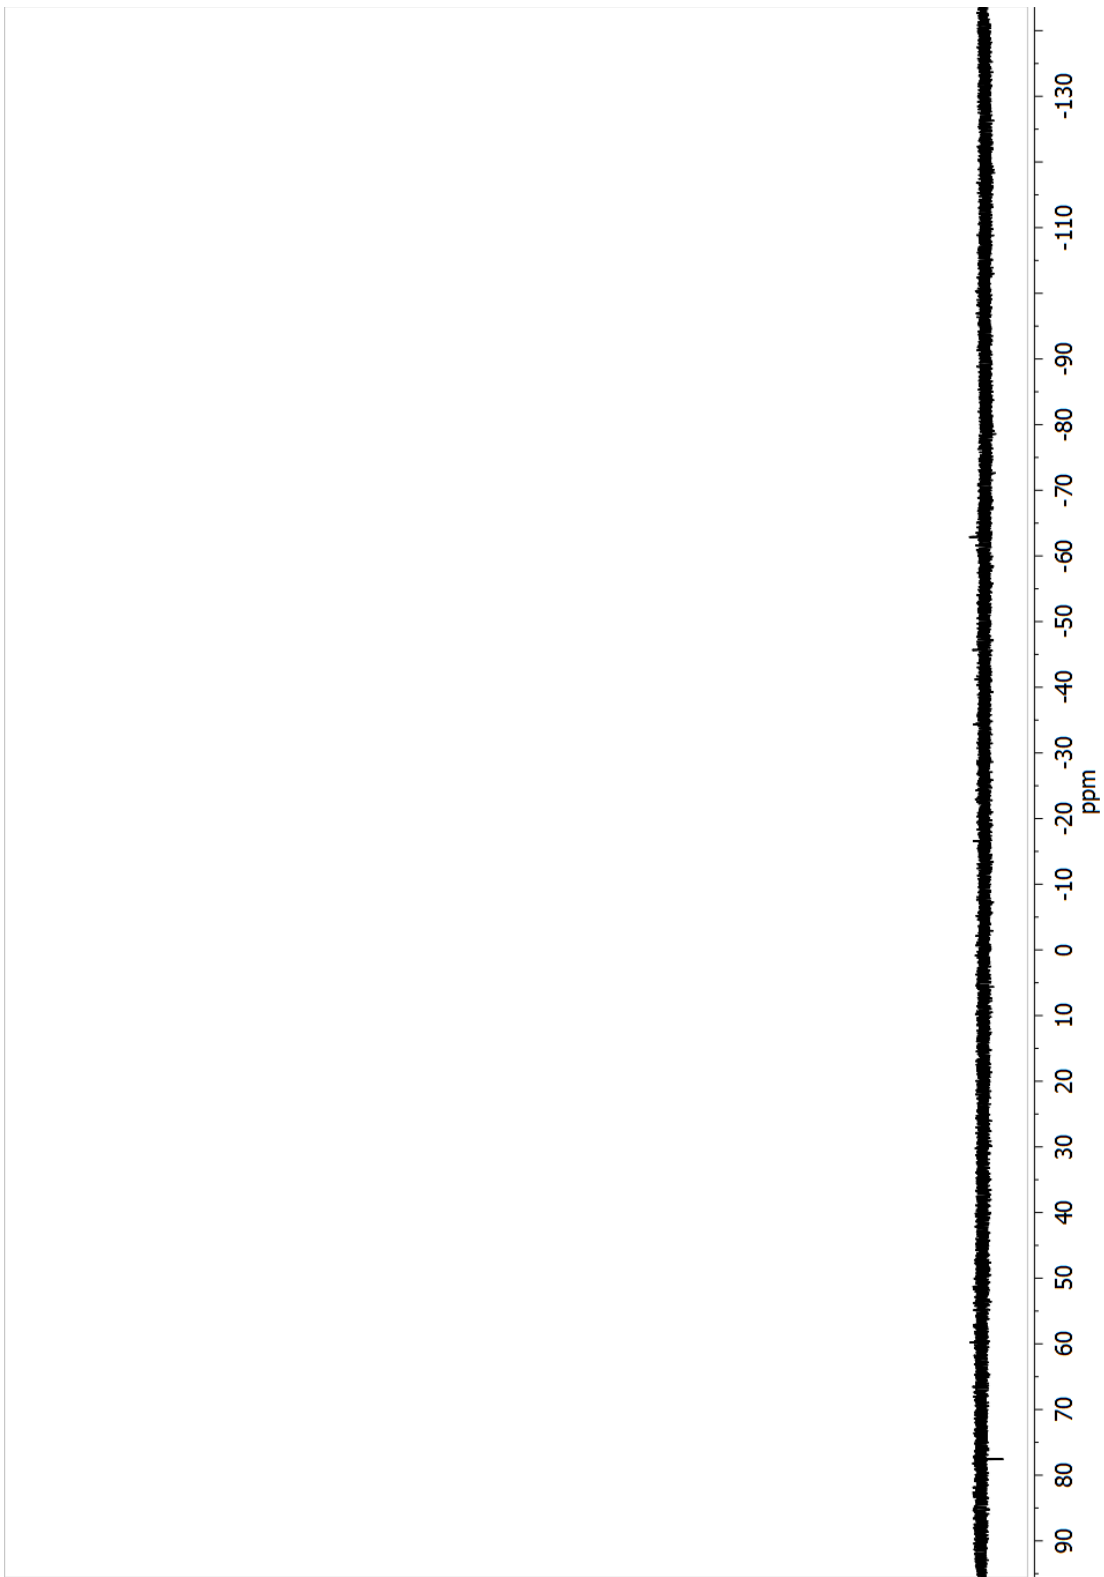

$^{19}\text{F}$  NMR of MO in  $\text{D}_2\text{O}$  (1% DMSO- $d_6$ ) with no fat.

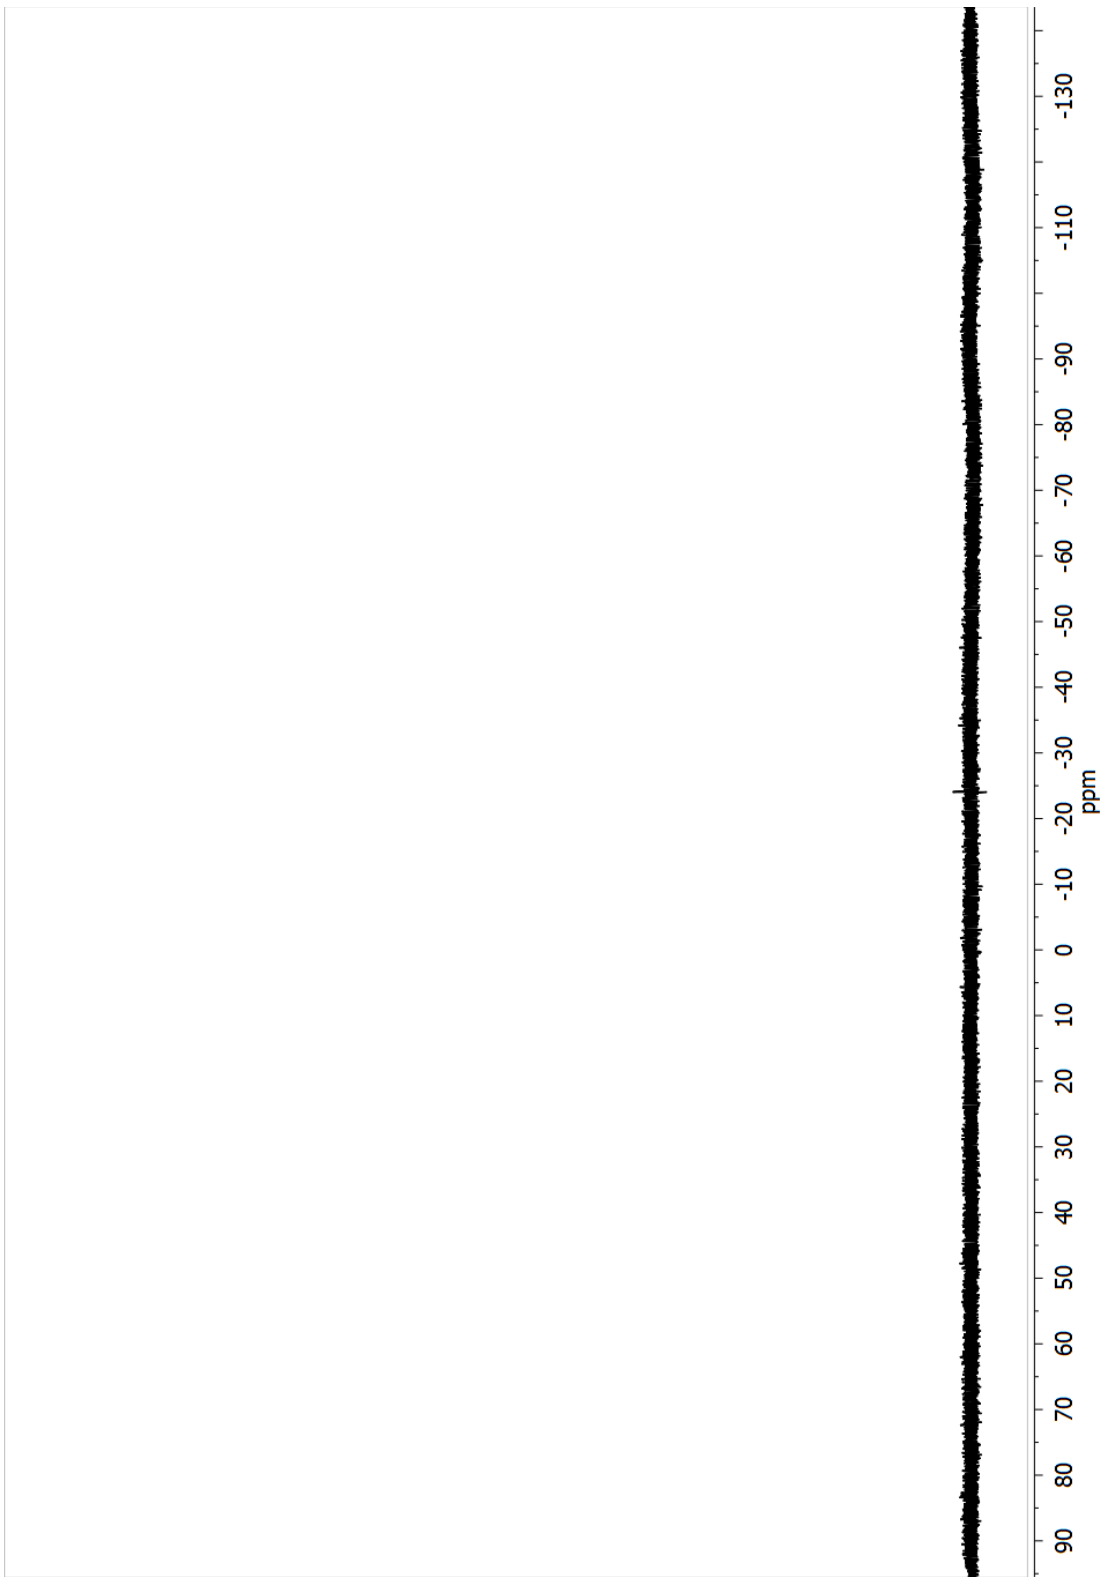

$^{19}\text{F}$  NMR of MO in  $\text{D}_2\text{O}$  (1%  $\text{DMSO-d}_6$ ) with 0.5% fat.

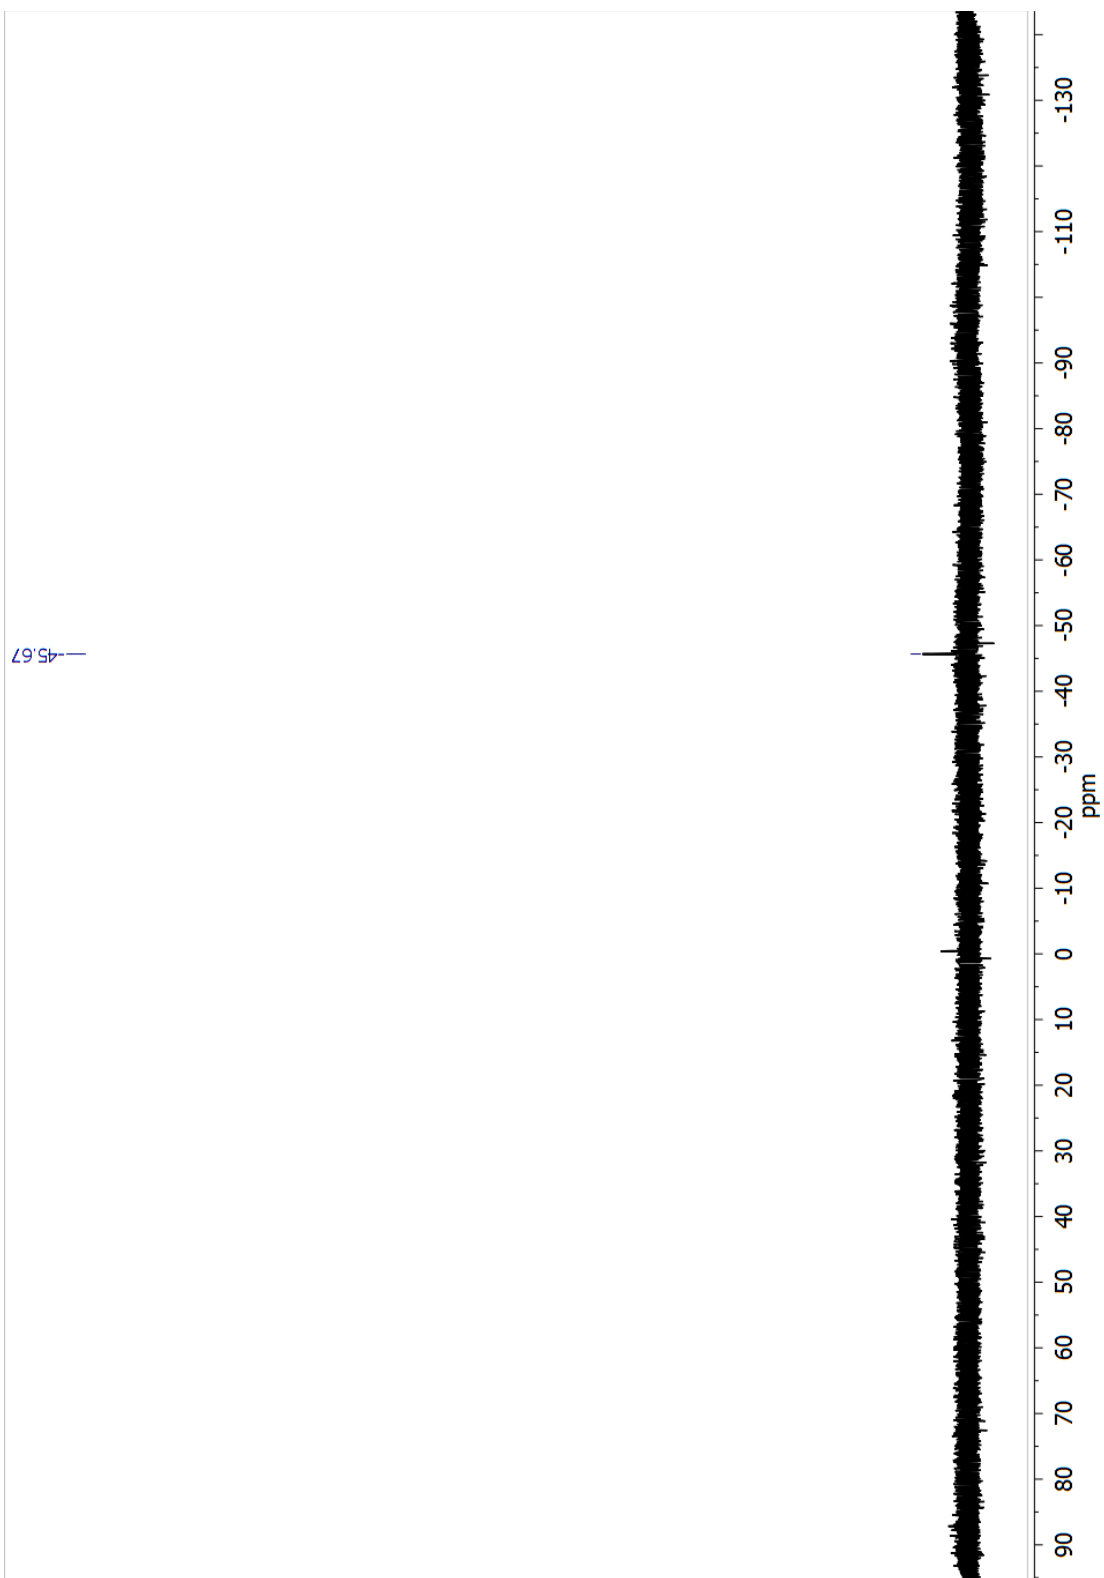

$^{19}\text{F}$  NMR of MO in  $\text{D}_2\text{O}$  (1% DMSO- $d_6$ ) with 1.0% fat.

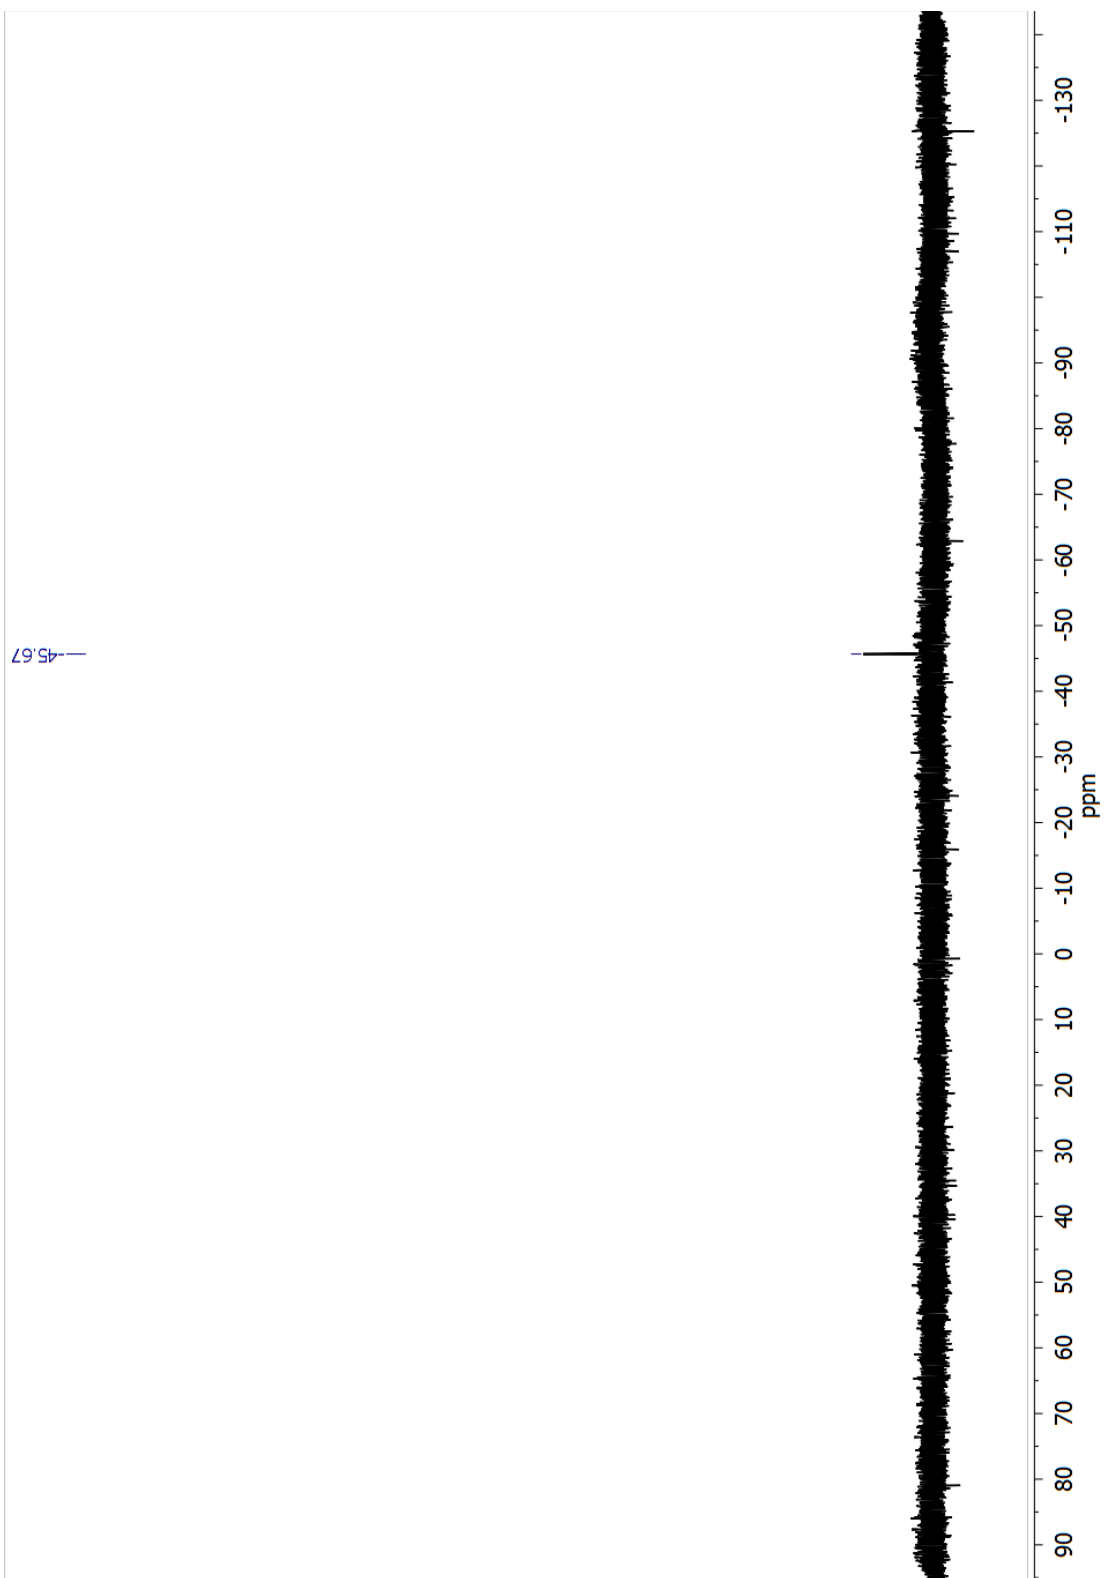

$^{19}\text{F}$  NMR of MO in  $\text{D}_2\text{O}$  (1%  $\text{DMSO-d}_6$ ) with 2.0% fat.



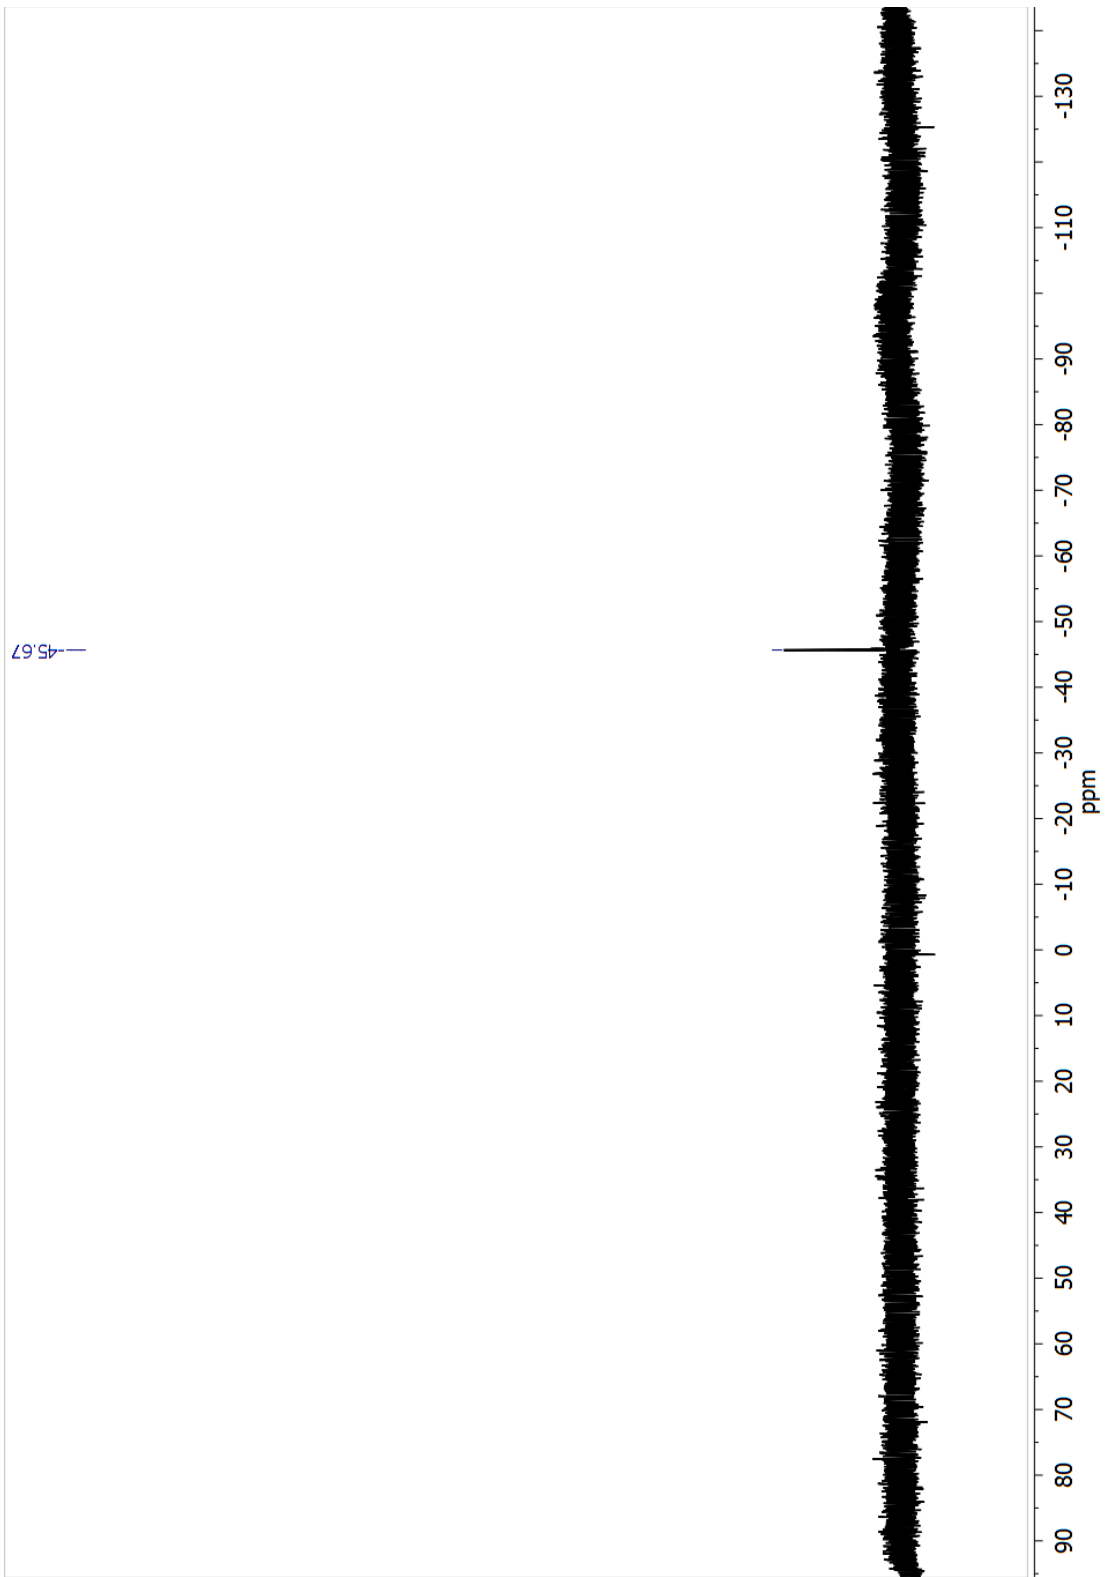

$^{19}\text{F}$  NMR of MO in  $\text{D}_2\text{O}$  (1% DMSO- $\text{d}_6$ ) with 4.0% fat.
